# Supplementary material for: LILRB4 regulates multiple myeloma development through STAT3-PFKFB1 pathway
Source: PubMed Central journal article supplement (PMC11258265; doi:10.1038/s41419-024-06883-4), 2024-07-18
Supplement: 41419_2024_6883_MOESM1_ESM.pdf [file 41419_2024_6883_MOESM1_ESM.pdf]

1010 **Supplemental materials**

1011 **Antibodies and Reagents**

1012 **Antibodies:** Anti-human CD85K-APC (eBioscience, CA, USA, #17-5139-42); Anti-  
1013 AnnexinV-APC (BD Pharmingen, CA, USA, #550475); anti-STAT3 (CST, CA, USA,  
1014 #30835), anti-phospho-STAT3 (Tyr705) (CST, CA, USA, #9145); anti-IKZF1 (CST, CA,  
1015 USA, #5543); anti- $\beta$ -actin-HRP (MBL, CA, Japan, PM053-7).

1016 **Reagents:** XF Cell Mito Stress Test Kit (Agilent, China, #103015-100), XF Glycolysis  
1017 Stress Test Kit (Agilent, #103020-100), ATP Bioluminescence Assay Kit HS II (Roche,  
1018 China, #11699709001).

1019

1020 **Cell lines**

1021 The human MM cell lines MM.1S, OPM2, LP-1, ARP1 and RPMI 8226 (ATCC) were  
1022 cultured in RPMI-1640 medium supplemented with 20% fetal bovine serum (FBS) and 1%  
1023 penicillin streptomycin. HEK293T cells were cultured in DMEM supplemented with 10%  
1024 FBS.

1025

1026 **Luciferase Reporter Assays**

1027 To evaluate the transcriptional regulation of LILRB4 by IKZF1 and PFKFB1 by STAT3, we  
1028 performed a luciferase reporter assay in 293T cells. In brief, 293T cells were cotransfected  
1029 with PLVX-STAT3-strepII (or empty vector) with the pGL4.27-PFKFB1 promoter or PLVX-  
1030 IKZF1-strepII with the pGL4.27-LILRB4 promoter for 24 hrs. Luciferase activities were  
1031 measured by using a luciferase reporter system (GloMax®Multi Instrument).  
1032 Measurements were calculated as firefly luciferase units vs. Renilla luciferase units.

1033

1034 **Chromatin immunoprecipitation (ChIP) assay**

1035 The ChIP assay was performed using the ChIP Assay Kit (Beyotime). 293T cells were  
1036 cotransfected with the PLVX-STAT3-strepII plasmid with the pGL4.27-PFKFB1-promoter  
1037 or PLVX-IKZF1-HA plasmid pGL4.27-LILRB4-promoter plasmid and crosslinked with 1%  
1038 formaldehyde (Sigma–Aldrich) at 37 °C for 10 min, followed by incubation with anti-strepII  
1039 or HA antibodies (Sigma) or control rabbit IgG (Santa Cruz) at 4 °C overnight before  
1040 immunoprecipitation. For the sample input, 1% of the sonicated precleared DNA was  
1041 purified at the same time as the precipitated immune complex. The ChIP samples were  
1042 purified by the Gel and PCR Clean-up Kit (Nucleospin). The STAT3- or LILRB4-binding  
1043 sequence was amplified by semiquantitative PCR using primers specific for human  
1044 PFKFB1 and LILRB4, as listed in Table S1.

1045

1046 **Immunoblot analysis**

1047 For immunoblot analysis, whole cell lysates were electrophoresed onto 10% sodium  
1048 dodecyl sulfate–polyacrylamide gels and transferred to nitrocellulose membranes  
1049 (Millipore). After blocking with a 5% solution of nonfat dried milk, the membranes were  
1050 incubated with the following primary antibodies at 4 °C overnight: anti-phospho-STAT3  
1051 (Tyr705) (CST, CA, USA, #9145), anti-STAT3 (CST, CA, USA, #30835) and anti- $\beta$ -actin  
1052 (MBL). The membranes were further incubated with the appropriate horseradish  
1053 peroxidase-conjugated secondary antibody (Sigma) at room temperature for 1 hr, followed

1054 by the detection of the protein level.

1055

#### 1056 **Quantitative RT-PCR**

1057 LILRB4-knockdown MM cells and scrambled MM cells were FACS-purified for RNA  
1058 extraction. First-strand cDNA was reverse transcribed using AMV reverse transcriptase  
1059 (TaKaRa). PCRs were performed according to the manufacturer's instructions (Roche).

1060 The experiments were conducted in triplicate with the Applied Biosystems 7900HT, and the  
1061 mRNA levels were normalized to the level of  $\beta$ -actin RNA transcripts. The sequences of  
1062 primers used are listed in Table S1.

1063

#### 1064 **Metabolic analyses of the oxygen consumption rate, extracellular acidification rate 1065 and ATP level**

1066 The oxygen consumption rate (OCR) and extracellular acidification rate (ECAR) were  
1067 detected in LILRB4-knockdown and scrambled ARP-1 cells with an XF Cell Mito Stress  
1068 Test Kit (Seahorse, 103015-100) and an XF Glycolysis Stress Test Kit (Seahorse, 103020-  
1069 100) using a Seahorse XF96 analyzer according to the manufacturer's instructions. For  
1070 the detection of OCR, 1.5  $\mu$ M oligomycin, 2  $\mu$ M FCCP and 0.5  $\mu$ M rotenone/antimycin were  
1071 loaded into injection ports A, B and C, respectively. During sensor calibration, the indicated  
1072 cells were incubated in 175  $\mu$ L of assay medium (XF Base Medium supplemented with 2  
1073 mM glutamine, 1 mM pyruvate, and 10 mM glucose, pH 7.4 at 37 °C) in a 37 °C CO<sub>2</sub>-free  
1074 incubator. For the ECAR test, injection port A on the sensor cartridge was loaded with 10  
1075 mM glucose. Then, 2.5  $\mu$ M oligomycin was loaded into port B, and 100 mM 2-DG was  
1076 loaded into port C. During sensor calibration, the cells were incubated in 175  $\mu$ L of assay  
1077 medium (XF Base Medium supplemented with 1 mM glutamine alone, pH 7.4 at 37 °C) in  
1078 a 37 °C CO<sub>2</sub>-free incubator.

1079

#### 1080 **Lactate measurement**

1081 Lactate levels in the supernatant were measured according to the manufacturer's protocol  
1082 (Sigma–Aldrich, MAK064). Briefly, 6 X10<sup>5</sup> LILRB4-knockdown and scrambled ARP-1 cells  
1083 were plated in RPMI-1640 medium and supplemented with 20% fetal bovine serum (FBS),  
1084 followed by incubation at 37 °C for 4 hr. The supernatant was centrifuged at 12,000 g at  
1085 4 °C for 5 min to remove cell debris before the analysis of lactate levels. Lactate levels  
1086 were determined by a spectrophotometer according to the manufacturer's protocol.

1087

# Figure S1

## A

### ARP-1

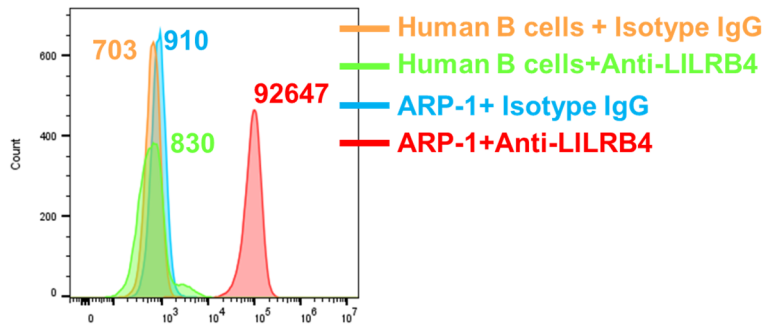

## B

### OPM-2

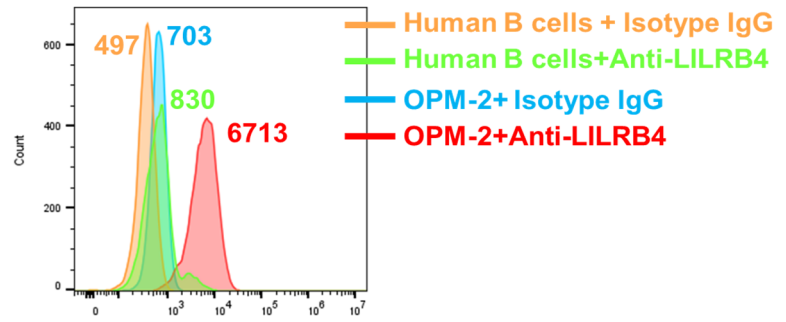

## C

### MM1.S

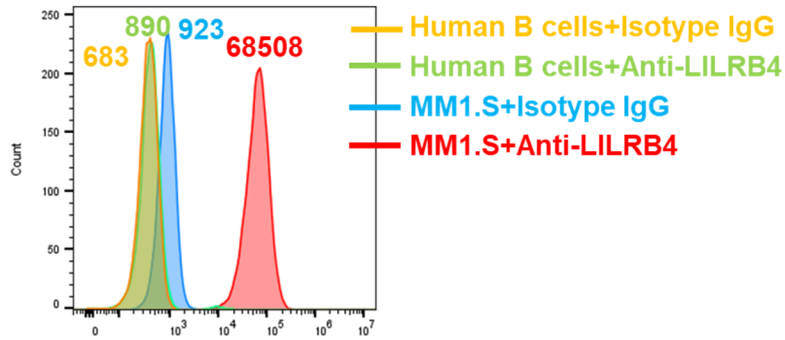

922 **Figure S1, related to Figure 1. LILRB4 is highly expressed on multiple myeloma cells.**  
923 (A-C) LILRB4 expression levels were quantified by flow cytometric analysis in ARP-1 (A),  
924 OPM2 (B), MM1.S (C) and normal B cells.

925  
926  
927  
928  
929  
930  
931  
932  
933  
934  
935  
936  
937  
938  
939  
940  
941  
942  
943  
944  
945  
946  
947  
948  
949  
950  
951  
952  
953  
954  
955  
956  
957  
958  
959  
960  
961  
962  
963  
964  
965

# Figure S2

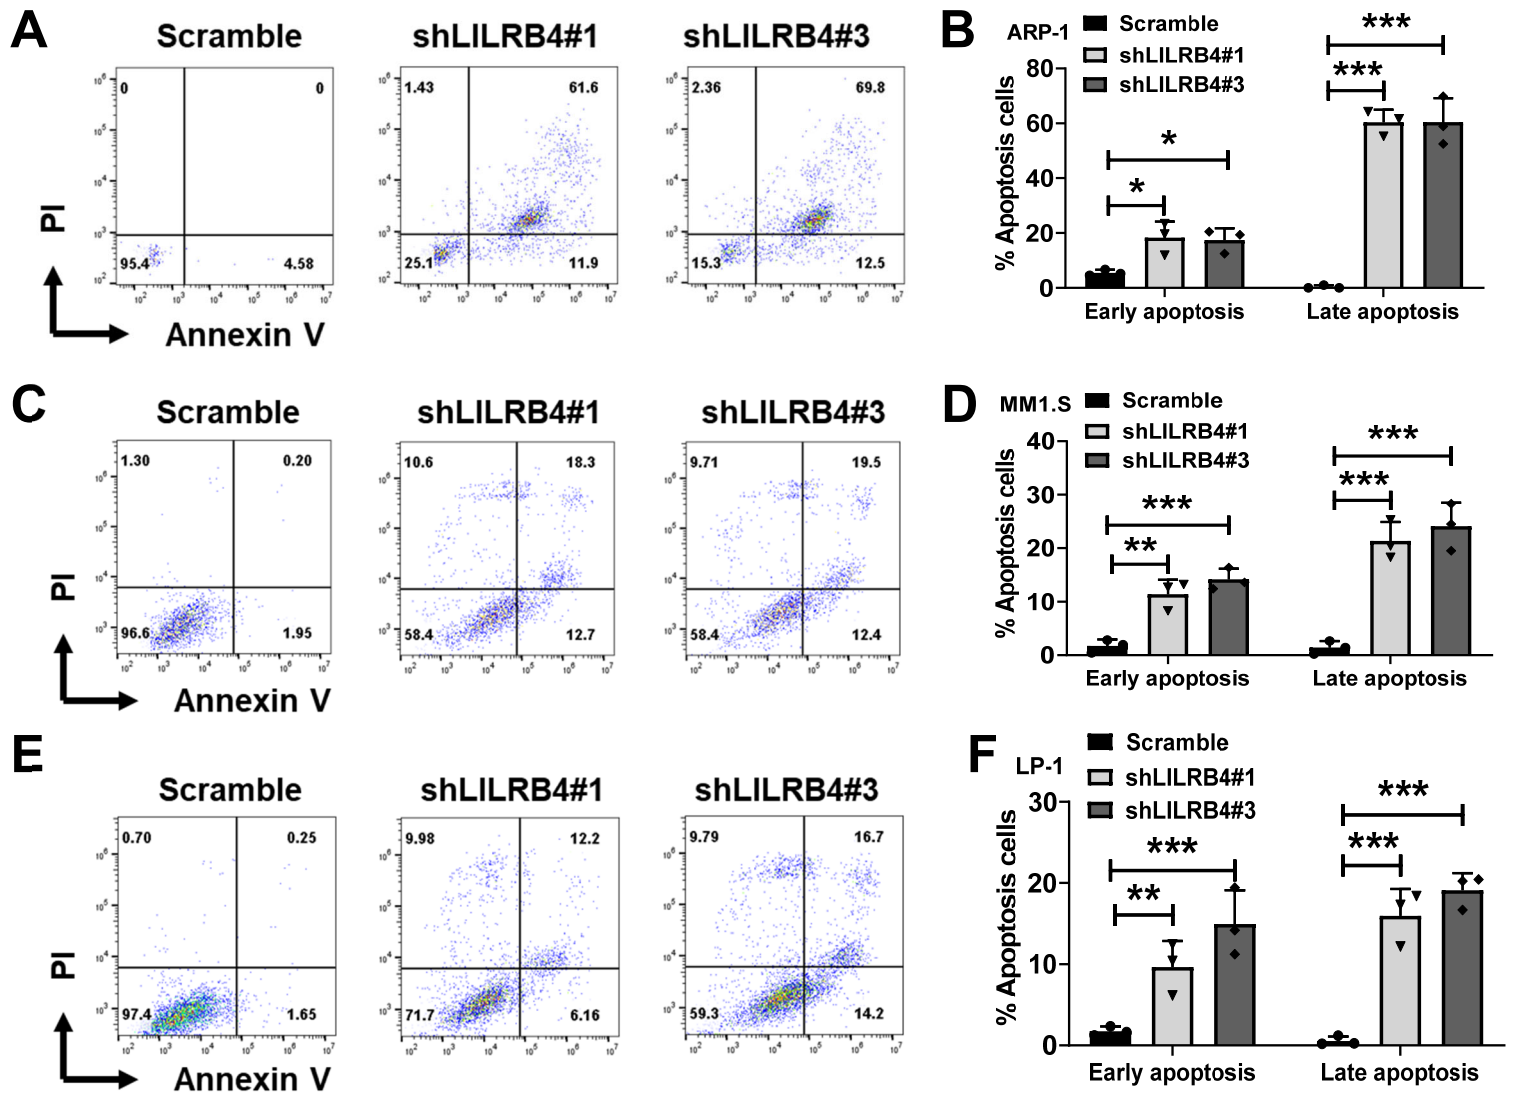

**Figure S2, related to Figure 2. LILRB4 supports MM cell proliferation in vitro.** (A-B) Representative flow cytometric analyses of percentages of early and late apoptotic cells in scrambled or LILRB4-knockdown (shLILRB4#1 and #3) ARP-1 cells. (C-D) Representative flow cytometric analyses of percentages of early and late apoptotic cells in scrambled or LILRB4-knockdown (shLILRB4#1 and #3) MM1.S cells. (E-F) Representative flow cytometric analyses of percentages of early and late apoptotic cells in scrambled or LILRB4-knockdown (shLILRB4#1 and #3) LP-1 cells. Two-way ANOVA with Sidak's multiple comparison test (B, D and F) was used for the comparison of statistical significance. \*,  $p < 0.05$ ; \*\*,  $p < 0.01$ ; \*\*\*,  $p < 0.001$ .

975  
976  
977  
978  
979  
980  
981  
982  
983  
984  
985  
986  
987  
988  
989  
990  
991  
992  
993  
994  
995  
996  
997  
998  
999  
1000  
1001  
1002  
1003  
1004  
1005  
1006  
1007  
1008  
1009

**Table S1. Primer sequences**

| <b>Human primers for qRT-PCR</b> | <b>Sequences</b>                                  |
|----------------------------------|---------------------------------------------------|
| STAB1-F                          | AACCACGTTTGTCACTCATGT                             |
| STAB1-R                          | CGGCAGTCCTGGGTATCTG                               |
| PTGS-F                           | CTGGCGCTCAGCCATACAG                               |
| PTGS -R                          | CGCACTTATACTGGTCAAATCCC                           |
| EGR1-F                           | GGTCAGTGGCCTAGTGAGC                               |
| EGR1-R                           | GTGCCGCTGAGTAAATGGGA                              |
| CDKN1A-F                         | TGTCCGTCAGAACCCATGC                               |
| CDKN1A -R                        | AAAGTCGAAGTTCATCGCTC                              |
| ALDH7A1-F                        | CCAGTATGCGTGGCTGAAAGA                             |
| ALDH7A1-R                        | CAGGGCAATAGGTCGTAATAACC                           |
| PSPH-F                           | GAGGACGCGGTGTCAGAAAT                              |
| PSPH -R                          | GGTTGCTCTGCTATGAGTCTCT                            |
| GADD45A-F                        | GAGAGCAGAAGACCGAAAGGA                             |
| GADD45A -R                       | CACAACACCACGTTATCGGG                              |
| BCL2A1-F                         | TACAGGCTGGCTCAGGACTAT                             |
| BCL2A1-R                         | CGCAACATTTTGTAGCACTCTG                            |
| FLT1-F                           | TTTGCCTGAAATGGTGAGTAAGG                           |
| FLT1-R                           | TGGTTTGCTTGAGCTGTGTTC                             |
| SAGE1-F                          | TACCAGGGATCTGCATTCTACC                            |
| SAGE1-R                          | CTGTGGGACCAGTTGACAAGA                             |
| IKZF1-F                          | CATCAGCCCGATGTACCAGC                              |
| IKZF1-R                          | CCTCGTTGTTGCTCTCGGT                               |
| IKZF3-F                          | GCTCATACAGACCCGCATGAT                             |
| IKZF3-R                          | AACTGGAACCATCTCCGAGGT                             |
| PFKFB1-F                         | TACCAGAGAACGACGGTCACT                             |
| PFKFB1-R                         | CTGCAATTATGCCAGGGTCATTA                           |
| $\beta$ -ACTIN-F                 | AGAGCTACGAGCTGCCTGAC                              |
| $\beta$ -ACTIN-R                 | AGCACTGTGTTGGCGTACAG                              |
| <b>Primers for shRNAs</b>        | <b>Target sequences</b>                           |
| Human shLILRB4#1                 | GCTCATAGTCTCAGGATCCTT                             |
| Human shLILRB4#3                 | CTCGGGAGTACCGTCTGGATA                             |
| <b>Primers for vector</b>        | <b>Sequences</b>                                  |
| Human PFKFB1-F                   | TCTATTTCCGGTGAATTCCTCGAGATGTCTCCAG<br>AGATGGGAGA  |
| Human PFKFB1-R                   | GCACCTCCAGGGATCCGCGGCCGCaGTAGTGGG<br>CTGGGACAGTAT |
| Human IKZF1-F                    | TCTATTTCCGGTGAATTCCTCGAGATGGAAGATA<br>TACAAACAAA  |
| Human IKZF1-R                    | GCACCTCCAGGGATCCGCGGCCGCaCTTCAGCA<br>GGGCTCTGTGTT |
| Human ALDH7A1-F                  | TCTATTTCCGGTGAATTCCTCGAGATGTGGCGCC                |

---

|                          |                                                        |
|--------------------------|--------------------------------------------------------|
| Human ALDH7A1-R          | TTCCTCGCGC<br>GCACCTCCAGGGATCCGCGGCCGC<br>TGATTCCTTGGG |
| <b>Primers for ChIP</b>  | <b>Sequences</b>                                       |
| PFKFB1-promoter-ChIP-3-F | CTTGGCATGAGGAACTTTAG                                   |
| PFKFB1-promoter-ChIP-3-R | TGGGCCCAAGTAGAATGTCA                                   |
| PFKFB1-promoter-ChIP-4-F | TGACATTCTACTTGGGCCCA                                   |
| PFKFB1-promoter-ChIP-4-R | CTTAGGAGTCGCACCGAATG                                   |
| LILRB4-promoter-ChIP-4-F | AGGAGGACACGGCTCTGATA                                   |
| LILRB4-promoter-ChIP-4-R | GGCGTCTCCTCCCAGGGGCC                                   |

---
